1  
2  
3  
4  
5  
6  
7  
8  
9  
10  
11  
12  
13  
14  
15

**Structure-Guided Mutagenesis Alters Deubiquitinating Activity  
and Attenuates Pathogenesis of a Murine Coronavirus**

Xufang Deng<sup>1</sup>, Yafang Chen<sup>2</sup>, Anna M. Mielech<sup>1</sup>, Matthew Hackbart<sup>1</sup>, Kristina R. Kesely<sup>3</sup>, Robert C. Mettelman<sup>1</sup>, Amornrat O'Brien<sup>1</sup>, Mackenzie E. Chapman<sup>2</sup>, Andrew D. Mesecar<sup>2,3</sup>, and Susan C. Baker<sup>1#</sup>

<sup>1</sup>Department of Microbiology and Immunology, Loyola University Chicago, Stritch School of Medicine, Maywood, IL, <sup>2</sup>Department of Biological Sciences, Purdue University, West Lafayette, IN, <sup>3</sup>Department of Biochemistry, Purdue University, West Lafayette, IN

#Corresponding Author: [sbaker1@luc.edu](mailto:sbaker1@luc.edu)

## 16 **Abstract**

17           Coronaviruses express a multifunctional papain-like protease, termed PLP2. PLP2 acts as  
18 a protease that cleaves the viral replicase polyprotein, and a deubiquitinating (DUB) enzyme which  
19 removes ubiquitin moieties from ubiquitin-conjugated proteins. Previous *in vitro* studies  
20 implicated PLP2 DUB activity as a negative regulator of the host interferon (IFN) response, but  
21 the role of DUB activity during virus infection was unknown. Here, we used X-ray structure-  
22 guided mutagenesis and functional studies to identify amino acid substitutions within the  
23 ubiquitin-binding surface of PLP2 that reduced DUB activity without affecting polyprotein  
24 processing activity. We engineered a DUB mutation (Asp1772 to Ala) into a murine coronavirus  
25 and evaluated the replication and pathogenesis of the DUB mutant virus (DUBmut) in cultured  
26 macrophages and in mice. We found that the DUBmut virus replicates similarly as the wild-type  
27 virus in cultured cells, but the DUBmut virus activates an IFN response at earlier times compared  
28 to the wild-type virus infection in macrophages, consistent with DUB activity negatively  
29 regulating the IFN response. We compared the pathogenesis of the DUBmut virus to the wild-type  
30 virus and found that the DUBmut-infected mice had a statistically significant reduction ( $p < 0.05$ )  
31 in viral titer in livers and spleens at day 5 post-infection, albeit both wild-type and DUBmut virus  
32 infections resulted in similar liver pathology. Overall, this study demonstrates that structure-guided  
33 mutagenesis aids the identification of critical determinants of PLP2-ubiquitin complex, and that  
34 PLP2 DUB activity plays a role as an interferon antagonist in coronavirus pathogenesis.

## 35 **Importance**

36           Coronaviruses employ a genetic economy by encoding multifunctional proteins that  
37 function in viral replication and also modify the host environment to disarm the innate immune  
38 response. The coronavirus papain-like protease 2 (PLP2) domain possesses protease activity,

39 which cleaves the viral replicase polyprotein, and also DUB activity (de-conjugating  
40 ubiquitin/ubiquitin-like molecules from modified substrates) using identical catalytic residues. To  
41 separate the DUB activity from the protease activity, we employed a structure-guided mutagenesis  
42 approach and identified residues that are important for ubiquitin-binding. We found that mutating  
43 the ubiquitin-binding residues results in a PLP2 that has reduced DUB activity but retains protease  
44 activity. We engineered a recombinant murine coronavirus to express the DUB mutant and showed  
45 that the DUB mutant virus activated an earlier type I interferon response in macrophages and  
46 exhibited reduced pathogenesis in mice. The results of this study demonstrate that PLP2/DUB is  
47 an interferon antagonist and a virulence trait of coronaviruses.

## 48 **Introduction**

49 Coronaviruses (CoVs) are members of the order *Nidovirales*, which includes enveloped viruses  
50 with large (~30kb), positive-sense single-stranded RNA genomes that yield a characteristic nested  
51 set of subgenomic mRNAs during replication in the cytoplasm of infected cells (1, 2). The genome  
52 organization for coronaviruses is highly conserved, with the 5'-most two-thirds of the genome  
53 encoding the replicase polyprotein, followed by sequences encoding the canonical structural  
54 proteins: spike, envelope, membrane, and nucleocapsid. Many CoVs contain accessory genes,  
55 which are interspersed among the genes for the structural proteins. Although these accessory genes  
56 are not necessarily required for virus replication and are, in general, not highly conserved within  
57 the virus family, many encode proteins that regulate the host response (3). Interestingly,  
58 coronavirus replicase proteins, which are highly conserved, can also act as antagonists to block or  
59 delay the host innate immune response to infection (1, 4–8). That a slew of coronavirus-encoded  
60 accessory and non-accessory proteins have been shown to shape the host antiviral response  
61 suggests that viral-mediated subversion of host defenses is an important element of infection. Here,

62 we focus on the viral protease/deubiquitinase (DUB) with the goal of assessing the role of DUB  
63 activity in shaping the pathogenesis of mouse hepatitis virus (MHV), a model murine coronavirus.

64 Coronavirus proteases are essential for viral replication as they are responsible for processing  
65 the replicase polyprotein (2, 9–11). Murine coronavirus MHV encodes three proteases: two  
66 papain-like proteases (PLP1 and PLP2) and one chymotrypsin-like protease (3CLpro, also termed  
67 Mpro). MHV PLP2 is similar to the single papain-like protease (termed PLpro) of Severe Acute  
68 Respiratory Syndrome Coronavirus (SARS-CoV) and Middle East Respiratory Syndrome  
69 Coronavirus (MERS-CoV) (9, 12–16). We and others have revealed that PLP2 or PLpro of  
70 multiple coronaviruses, including MHV, are multifunctional, not only capable of cleaving the viral  
71 polyprotein but also possessing deubiquitinase (DUB) and deISGylating (de-conjugating ISG15  
72 molecule from modified substrates) activities (9, 12, 13, 15–27). However, it has been challenging  
73 to study the effects of a mutated DUB on virus replication and pathogenesis because the protease  
74 and DUB activities share the same catalytic site, disruption of which is lethal for virus replication.  
75 Therefore, it was necessary for us to identify residue(s) within the MHV protease/DUB-ubiquitin  
76 binding surface that can be mutated to result in reduced DUB activity without affecting polyprotein  
77 processing. In this report, we describe the X-ray structure-guided identification of such residues  
78 and evaluate the replication, IFN antagonistic effect, and pathogenesis of a recombinant DUB  
79 mutant MHV.

## 80 **Results**

81 **Structure-guided identification of PLP2 residues interacting with ubiquitin.** To investigate  
82 the role of viral deubiquitinating activity in coronavirus replication and pathogenesis, we first  
83 needed to identify amino acid residues that, when mutated, result in reduced DUB activity while

84 preserving the enzyme's deISGylating and protease activities, the latter being necessary for viral  
85 replication. X-ray structural studies of SARS- and MERS-CoV papain-like protease/DUBs co-  
86 crystalized with ubiquitin modified at the c-terminus with a covalent warhead (aldehyde, 3-bromo-  
87 propylamine, or propargylamine) allowed for identification of residues that are important for direct  
88 interaction with ubiquitin (17, 18, 20). Here, we took a slightly different approach and mutated the  
89 catalytic cysteine (C1716) of MHV PLP2 to a serine residue and co-crystallized it with free  
90 ubiquitin. The X-ray structure of MHV PLP2 (C1716S) in complex with ubiquitin was determined  
91 to a resolution of 1.85 Å and an overall  $R_{free} = 19.6\%$  and  $R_{work} = 15.8\%$  (PDB: 5WFI). The overall  
92 structure of the MHV PLP2-ubiquitin complex is similar to other PLP2/PLpro ubiquitin-bound  
93 structures (Fig. 1A). Ubiquitin binds within the palm region and is gripped by the zinc-fingers  
94 motif while the C-terminus extends into the active site.

95         Next, we aligned the primary amino acid sequence of the MHV PLP2 domain with the  
96 SARS-CoV and MERS-CoV papain-like protease domains (Fig. 1E). The sequence alignment and  
97 X-ray structure of the MHV PLP2-ubiquitin complex were then analyzed in conjunction with the  
98 previous structural and mutagenesis studies on SARS- and MERS-CoV to identify candidate  
99 residues that could be mutated to render a loss of DUB activity *in vitro*. From this analysis, we  
100 identified three residues (R1803, D1772, F1812) in MHV PLP2 that form direct interactions with  
101 ubiquitin (Fig. 1B-D). Two of the side chain guanidinium nitrogens of R1803 form direct hydrogen  
102 bonds with the backbone carbonyl oxygen of A46 in ubiquitin (Fig. 1B). The two side chain  
103 carboxylate oxygens of D1772 in MHV PLP2 interact with ubiquitin by forming direct bonds with  
104 each of the guanidinium nitrogens of R42 and with one of the guanidinium nitrogens of R72 (Fig.  
105 1C). Finally, F1812 forms Van der Waals contacts with the side chains of I44 and V70 and the  
106 delta-carbon of R42 of ubiquitin (Fig. 1D).

107 **Biochemical analysis of PLP2 mutants' activities.** To identify a mutant MHV PLP2 enzyme that  
108 retains protease activity but exhibits reduced DUB and/or deISGylating activity, we performed  
109 site-directed mutagenesis on each of the residues (R1803, D1772, F1812) by changing each to an  
110 alanine to disrupt interactions with ubiquitin. Each mutant enzyme was expressed, purified, and  
111 tested for its ability to hydrolyze three substrates: z-RLRGG-AMC, Ub-AMC, and ISG15-AMC.  
112 The activity of each mutant enzyme toward each substrate relative to the wild-type enzyme is  
113 shown in Fig. 2A. All three mutants retained their ability to hydrolyze the peptide substrate but  
114 each mutant had altered specificity toward Ub-AMC and ISG15-AMC substrates. Mutation of  
115 F1812 resulted in a substantial decrease in hydrolysis of both Ub-AMC and ISG15-AMC (Class  
116 I), whereas mutation of R1803 resulted in loss of activity only toward ISG15-AMC (Class II), and  
117 mutation of D1772 resulted in loss of activity only toward Ub-AMC (Class III).

118 Since one of the primary goals of this study is to understand the contribution of DUB  
119 activity to viral replication and pathogenesis, we next focused on quantitating further the effects  
120 of the D1772A mutant on the steady-state kinetic parameters of MHV PLP2 toward the three  
121 different substrates (Fig. 2B). The RLRGG-AMC peptide substrate is often used as surrogate of  
122 the viral polyprotein substrate and the kinetic data in Fig. 2B show that this substrate is still well-  
123 recognized and cleaved by the D1772A mutant. In fact, we observed a small rate enhancement in  
124 the catalytic efficiency (i.e.,  $k_{cat}/K_m$ ) compared to the wild-type enzyme.

125 The Ub-AMC substrate, on the other hand, is poorly recognized and cleaved by the  
126 D1772A mutant compared to the wild-type enzyme. The wild-type enzyme normally interacts  
127 strongly with Ub-AMC with a  $K_m$  value of 0.67  $\mu\text{M}$ . However, mutation of D1772 to an alanine  
128 significantly disrupts the interaction with ubiquitin, making it impossible to saturate MHV PLP2

129 under normal experimental conditions (Fig. 2B). The net result is a significant reduction in the  
130 catalytic efficiency ( $k_{cat}/K_m$ ) compared to the wild-type enzyme, which was the goal of these trials.

131 The kinetic response of MHV PLP2 toward another substrate, ISG15-AMC, was also  
132 determined. ISG15 is an important ubiquitin-like modifier that is upregulated and used to ISGylate  
133 host proteins during viral infection. A number of viruses, including coronaviruses, engender  
134 ISGylation during infection but the function(s) and importance of this activity are not clear (28–  
135 30). For MHV, neither the wild-type nor the D1772A mutant PLP2 enzyme can be saturated with  
136 ISG15-AMC, suggesting weak binding with this ubiquitin-like modifier (Fig. 2B). Moreover, the  
137 R1772A mutation does not disrupt the interaction with ISG15 but in fact enhances it to some  
138 degree. A potential explanation for the observed selective disruption of ubiquitin binding stems  
139 from our analysis of a primary sequence alignment of ubiquitin and ISG15 and the residues that  
140 interact with D1772 (Fig. 2C). The interaction between MHV PLP2 D1772 and the R42 residue in  
141 human and mouse ubiquitin is absent in human and mouse ISG15 since this residue is a tryptophan  
142 in human and mouse ISG15. Therefore, in line with our observations, D1772A mutation would  
143 not be expected to alter ISG15 binding. In contrast to R42, residue R72 is conserved in both  
144 ubiquitin and ISG15 and its interaction with MHV PLP2 for ubiquitin is likely weaker than that  
145 with ISG15.

146 **PLP2 D1772A mutant exhibits reduced DUB activity and inhibition of IFN response in cell**  
147 **culture based assays.** The *in vitro* biochemical studies presented here support the notion that we  
148 are able to use a structure-guided mutagenesis to uncouple the DUB enzymatic activity from MHV  
149 PLP2 while preserving the peptide hydrolysis and deISGylating activities of PLP2. Next, we  
150 focused on comparing the activity of the mutant enzyme to its wild-type counterpart for the ability  
151 to remove Flag-tagged-ubiquitin conjugated to host proteins in cultured cells (Fig. 3A). We found

152 that in cells, wild-type PLP2 exhibits robust DUB activity and removes ubiquitin modifications  
153 from multiple cellular proteins. On the other hand, the PLP2-D1772A mutant exhibits reduced  
154 DUB activity, similar to that of the previously documented catalytic cysteine to alanine mutant,  
155 PLP2-CA (19). To determine if this impaired DUB activity altered the ability of PLP2 to act as an  
156 interferon antagonist, we transfected cells with a RIG-I expression plasmid, an interferon-  
157 luciferase reporter construct, and either wild-type or mutant PLP2 plasmid and measured luciferase  
158 activity at 18 hours post-transfection. In agreement with previous reports (13, 25, 31), we find that  
159 wild-type PLP2 acts as an interferon antagonist, reducing reporter activity by 50-80%. In contrast,  
160 PLP2-D1772A is unable to significantly reduce interferon activation in this assay despite similar  
161 expression levels of the wild-type and mutant versions of the protein (Fig. 3B). We also evaluated  
162 the protease activity of the enzymes in cells using two independent *trans*-cleavage assays and  
163 found that the wild-type and DUB-mutant enzymes produce similar levels of cleaved products.  
164 These results indicate that the D1772A substitution did not alter protease activity (Fig. 3C and D),  
165 in agreement with the *in vitro* kinetic results described above (Fig. 2). Together, these studies  
166 reveal that aspartic acid residue 1772 of MHV-PLP2 is important for DUB activity and interferon  
167 antagonism, but not for protease activity.

168 **Recombinant MHV harboring PLP2-D1772A activates an earlier IFN response in bone**  
169 **marrow-derived macrophages.** Since the D1772A substitution did not impact protease activity,  
170 we reasoned that we should be able to generate recombinant virus containing this substitution,  
171 thereby allowing us to determine if the mutation has any effect on viral replication kinetics and  
172 interferon antagonism in the context of the live virus. We engineered the mutant virus *via* reverse  
173 genetics (32), performed full genome sequencing to verify the genotype (2 nucleotide changes at  
174 positions 5525 and 5526, resulting in D1772A substitution in the replicase polyprotein), and



175 designated the virus as DUBmut. Upon evaluating virus replication of the DUBmut virus by  
176 performing a growth kinetics experiment in parallel with wild-type virus, we found that the  
177 DUBmut virus replicates with essentially identical kinetics as the wild-type in a murine  
178 astrocytoma cell line (DBT cells) (Fig. 4A). These results are consistent with previous studies of  
179 coronavirus interferon antagonists, which showed in many cell lines that viral-mediated interferon  
180 antagonism is not essential for virus replication (5, 6). Regarding the other ubiquitin-interacting  
181 residues identified in the structural analysis, we attempted to rescue virus with substitutions at the  
182 F1812 position, but were unable to recover viable virus. These results indicate that F1812 may  
183 play a critical role within the polyprotein during virus replication. We were able to recover virus  
184 containing the R1803A substitution, but found that it had no detectable phenotype, which we  
185 documented in our previous study (5). Here, we focus our efforts on evaluating replication and  
186 pathogenesis of the recovered DUBmut virus.

187 To determine if the impaired DUB activity of the DUBmut virus had an effect on interferon  
188 antagonism, we infected primary bone marrow-derived macrophages (BMDMs) and evaluated  
189 viral replication kinetics and levels of interferon mRNA and protein. We observed significant  
190 activation of interferon alpha (IFN $\alpha$ ) mRNA expression (Fig. 4A) that is coupled with release of  
191 IFN $\alpha$  protein into the supernatant, as detected by ELISA (Fig. 4B). We show that this activation  
192 of IFN $\alpha$  is dependent on expression of pattern recognition receptor MDA5 (Fig. 4D), in agreement  
193 with previous reports (5, 6, 33). To our surprise, we found that replication of DUBmut is not  
194 impaired relative to the wild-type virus in BMDMs, as measured by level of nucleocapsid RNA  
195 (Fig. 4E) and evaluation of infectious virus particle production over time in the kinetics assay (Fig.  
196 4F). These results demonstrate that an elevated interferon response is generated during replication

197 of the DUBmut virus, but that this interferon profile is not associated with reduced production of  
198 infectious particles in either DBT cells or BMDMs.

### 199 **Disrupting DUB activity mildly attenuates coronavirus pathogenesis in mice.** To

200 complement our *in vitro* studies, we next sought to determine whether loss of DUB activity and  
201 the observed activation of interferon during the DUBmut virus infection in macrophages is  
202 associated with an attenuated pathogenesis in mice. To test this, we first inoculated mice using the  
203 intracranial infection model to evaluate lethality among WT and DUBmut-infected mice, and  
204 found similar weight loss and lethality (data not shown). To investigate the pathogenesis in the  
205 liver, we inoculated four- (young) or six-week-old (adult) mice intra-peritoneally with a low dose  
206 ( $6 \times 10^3$  plaque-forming units [pfu]) or a high dose ( $6 \times 10^4$  pfu) of the designated virus, respectively,  
207 and measured viral titer in the liver and spleen at the indicated days post-infection (dpi). We  
208 observed similar levels of infectious particles in young mice inoculated with a high dose of virus  
209 and adult mice with a low dose at 3 and 5 dpi (data not shown), but detected reduced viral titers in  
210 the spleens of young mice infected with a low dose of DUBmut virus at 3 dpi (Fig. 5A) and adult  
211 mice inoculated with a high dose at 5 dpi (Fig. 5B). Similar pathology in liver sections was  
212 observed at 3 and 5 dpi (Fig. 5C). These results indicate that the DUBmut virus is mildly attenuated  
213 compared to the wild-type virus, suggesting that the DUB activity does play a role in MHV  
214 pathogenesis and PLP2 is a virulence factor.

## 215 **Discussion**

216 In the present study, we aimed to investigate the roles of PLP2 DUB activity during  
217 coronavirus infection. Through structure-guided mutagenesis, we identified residues of MHV  
218 PLP2 that mediates its interaction with ubiquitin. By mutating the residue Asp-1772 to Ala

219 (D1772A), we found that the DUB activity of PLP2 was greatly reduced and a recombinant MHV  
220 carrying this mutation (DUBmut) activated an earlier IFN response in macrophages. Although we  
221 only observed a subtle attenuation of the DUBmut virus in the tested animal models, we  
222 demonstrated that PLP2 DUB activity does play a role in suppressing the host immune response  
223 and is a virulence trait, strengthening our earlier discoveries on SARS-CoV PLpro (4). We further  
224 investigated the differences in the interferon response generated in response to WT versus  
225 DUBmut virus in our companion study (Volk et al., submitted), which further supports a role for  
226 DUB activity in modulating the interferon response in macrophages.

227         The structure-guided approach used to generate the DUBmut virus allowed for  
228 characterization of three different classes of mutant enzymes: Class I, deficient in both DUB and  
229 deISGylating activity; Class II, deficient in deISGylating activity only; and Class III, deficient in  
230 DUB activity but competent in protease and deISGylating activity. We utilized three unique  
231 biochemical substrates, each with a conjugated fluorescent AMC reporter, to evoke the multi-  
232 functional activities of PLP2. Activity against the z-RLRGG-AMC peptide substrate represents  
233 the polyprotein processing activity of MHV PLP2, while Ub-AMC and ISG15-AMC stimulate  
234 the deubiquitinating and deISGylating activities of the enzyme, respectively (17, 34). The kinetic  
235 data for the D1772A DUBmut hydrolysis of the z-RLRGG-peptide provided in Figure 2B indicate  
236 that the polyprotein processing ability of this mutant is likely not affected by the D1772A  
237 substitution. The deISGylating ability of the enzyme is also not affected. In contrast, the mutant  
238 enzyme's deubiquitinating activity is significantly reduced relative to wild-type, which is most  
239 likely due to a lowered binding affinity for ubiquitin as the enzyme could not be saturated with  
240 Ub-AMC as a substrate.

241 We can also use these structural, mutagenesis and kinetic characterization studies on MHV  
242 PLP2 to guide future structure-based design studies of emerging coronaviruses, such as the newly  
243 emerged novel coronavirus 2019 (nCoV-2019) (35–38). By aligning the X-ray structure of the  
244 PLpro domains of SARS-CoV bound to ubiquitin (17) with the sequence of nCoV-2019 PLpro  
245 (Fig. 6A) and comparing the differences in their residues with those of MHV PLP2 (Fig. 1E), we  
246 observe significant differences in the potential interactions between nCoV-2019 and ubiquitin. For  
247 example, we found that the hydrogen bonds between MHV PLP2 R1803 and the carbonyl oxygen  
248 of UbA46 (Fig. 1B) are lost in nCoV-2019 and SARS-CoV (Fig. 6B). In contrast, the hydrogen  
249 bonds between MHV PLP2 D1772 and Ub residues R42 and R72 (Fig. 1C) are likely preserved  
250 with the substitution of E1772 in nCoV-2019 and SARS-CoV PLpro (Fig. 6C). The hydrophobic  
251 interactions between Ub residues I44 and V70 and F1812 of MHV PLP2 (Fig. 1D) also appear to  
252 be preserved with M1812 of nCoV-2019 and SARS-CoV PLpro (Fig. 6D). The X-ray structures  
253 of MHV PLP2 and SARS-CoV PLpro, together with our structural model of nCoV-2019 PLpro,  
254 will provide testable hypotheses for the design and mutagenesis of the ubiquitin-binding domain  
255 (17) and diubiquitin-binding domains (20) of the recently emerged coronavirus nCoV-2019 PLpro.

256 We were able to reproduce the enzymatic profile of the purified PLP2-D1772A mutant  
257 protein when we expressed it in cell culture (Fig. 3). Therefore, our finding that the DUBmut virus  
258 containing the PLP2-D1772A substitution activates an elevated antiviral response in macrophages  
259 compared to the wild-type virus, but that this antiviral state results in only mild attenuation of  
260 disease in mice relative to WT infection, was unexpected. Previous studies demonstrated that  
261 ubiquitin has important roles in both the activation and the attenuation of innate antiviral pathways  
262 (39); therefore, we anticipated a more remarkable phenotype for a DUB-mutant virus. We can  
263 imagine several possible explanations for our findings. First, it is possible that viral DUB activity

264 has a relatively minor role in shaping pathogenesis in this system. In fact, our recent studies using  
265 SARS-CoV and SARS-related CoVs found that the papain-like protease domain/DUB is a  
266 virulence trait that varies among members of the SARS-coronavirus species (4). In that study, we  
267 found that replacing the SARS PLP2/DUB domain with a SARS-related PLP2/DUB domain  
268 reduced the ability of that virus to antagonize the innate immune response. Together, this previous  
269 report in conjunction with the current study support the concept that different PLP2/DUB domains  
270 may have distinct effects on antagonism of the innate immune response depending on the virus  
271 and the host cell type. Another possibility is that the DUB-mutant virus we generated may not have  
272 been sufficiently debilitated in its DUB activity to result in altered pathogenesis. We found that it  
273 was difficult to recover viable DUB-mutant viruses; indeed, this D1772A mutant was the sole  
274 viable DUB-mutant representative of our many attempts. Because an elevated interferon response  
275 was elicited from the DUBmut-infected cells, this mutant virus fulfilled our criteria demonstrating  
276 the inactivation of an interferon antagonist. However, we speculate that if we are able to recover  
277 mutants that exhibit a range of DUB activity, we may be able to more fully assess the role of DUB  
278 activity as a contributor to coronaviral pathogenesis. Despite these caveats, the MHV DUB-mutant  
279 generated in this study did exhibit a reproducible phenotype of eliciting an elevated interferon  
280 response in infected macrophages that was associated with mild attenuation of pathogenesis with  
281 reduced titers in the livers and spleens of infected mice. Overall, we conclude that DUB activity  
282 is indeed a virulence trait, and contributes to the ability of MHV to modulate the host innate  
283 immune response to infection. Further studies are needed to identify the targets of viral DUB  
284 activity and the detailed role of DUB activity in delaying the innate immune response to virus  
285 replication.

## 286 **Materials and Methods**

## 287 **Ethics Statement**

288           The mouse experiment in this study was carried out in accordance with the  
289 recommendations in the Guide for the Care and Use of Laboratory Animals of the National  
290 Institutes of Health. The experimental protocol was reviewed and approved by the Institutional  
291 Animal Care and Use Committee (IACUC) at Loyola University Chicago (IACUC#: 2016-029).  
292 C57BL/6 female mice were purchased from The Jackson Laboratory and maintained in the  
293 Comparative Medicine Facility of Loyola University Chicago. Mice were consistently monitored  
294 for signs of distress over the course of the experiments to be removed from the experiment and  
295 euthanized using carbon dioxide inhalation to prevent unnecessary suffering.

## 296 **Cells**

297           Human embryonic kidney (HEK) 293T cells were purchased the from American Type  
298 Culture Collection (ATCC, # CRL-11268) and maintained in DMEM (#10-017-CV, Corning)  
299 containing 10% fetal calf serum (FCS) and supplemented with 1% nonessential amino acids, 1%  
300 HEPES, 2% L-glutamine, 1% sodium pyruvate, and 1% penicillin/streptomycin. DBT cells were  
301 cultured in MEM (#61100-061, ThermoFisher) supplemented with 5% FCS, 2% L-glutamine, and  
302 10% Tryptose Phosphate Broth (TPB). The 17Cl-1 cell line was maintained in DMEM containing  
303 5% FCS. Baby hamster kidney cells expressing the MHV receptor (BHK-R) were kindly provided  
304 by Mark Denison (Vanderbilt University Medical Center) and maintained in DMEM supplemented  
305 with 10% FCS, 2% L-glutamine, and 0.8  $\mu\text{g}/\text{mL}$  G418. Bone marrow-derived macrophages  
306 (BMDMs) were prepared and cultured as described previously (5).

## 307 **Plasmids and mutagenesis**

308           The sequence of the PLP2 domain (amino acids 1525-1911 of MHV pp1ab) in frame with  
309 a V5 epitope tag was codon-optimized, synthesized by Genscript (Piscataway, NJ) (sequence  
310 available upon request), and cloned into pCAGGS vector. For mutagenesis, an overlapping PCR

311 strategy was used with synthetic primers (sequences available upon request). The introduced  
312 mutations were verified by sequencing. The RIG-I and nsp2/3-GFP expression plasmid was kindly  
313 provided Ralph Baric (University of North Carolina). The IFN $\beta$ -Luc reporter plasmid was a gift  
314 of John Hiscott (Jewish General Hospital, Montreal, Canada). The Flag-Ub plasmid was kindly  
315 provided by Adriano Marchese (University of Wisconsin-Milwaukee).

### 316 **MHV PLP2 wild-type and mutant purification, kinetics, and X-ray structure**

317 The wild-type, C1716S, D1772A, R1803A, and F1812A mutant enzymes were expressed  
318 and purified similar to our previously published methods except that the MHV PLP2 construct  
319 used here (amino acids N1609 to N1909) was absent the DPUP domain (16). Crystallization and  
320 X-ray structure determination details will be published elsewhere. Steady-state kinetic studies on  
321 the wild-type, D1772A, R1803A, and F1812A mutant enzymes with substrates Z-RLRGG-AMC  
322 (where Z is a carboxybenzyl protecting group), Ubiquitin-AMC, and ISG15-AMC were performed  
323 as described previously (16). Structure figures were generated with the software program UCSF  
324 Chimera (40).

### 325 **Protease and deubiquitinating activity assays**

326 To determine the protease activity of PLP2, HEK293T cells grown to 70% confluency in  
327 24-well plates (Corning) were transfected using *TransIT-LT1* (MIR2300, Mirus) according to the  
328 manufacturer's protocol. For the protease activity assay, HEK293T cells were transfected with 25  
329 ng nsp2/3-GFP plasmid and 200 ng pCAGGS-PLP2-V5 expression plasmids (wild-type and  
330 mutant). To determine deubiquitinating activity of the proteins, cells were transfected with 200 ng  
331 Flag-Ub plasmid and pCAGGS-PLP2-V5 expression plasmids (wild-type and mutant). Cells were  
332 lysed 24 h post-transfection with 100  $\mu$ L of lysis buffer (comprising 20 mM Tris [pH 7.5], 150  
333 mM NaCl, 1mM EGTA, 1mM EDTA, 1% Triton X-100, 2.5 mM sodium pyrophosphate, 1mM  $\beta$ -

334 glycerophosphate, 1mM sodium orthovanadate, 1  $\mu$ g/mL leupeptin, and 1mM  
335 phenylmethylsulfonyl fluoride). Whole cell lysates were separated by SDS-PAGE and transferred  
336 to PVDF membrane in transfer buffer (0.025M Tris, 0.192M glycine, 20% methanol) for 1 hour  
337 at 60 Volts at 4°C. Following this, the membrane was blocked using 5% dried skim milk in TBST  
338 buffer (0.9% NaCl, 10mM Tris-HCl, pH7.5, 0.1% Tween 20) overnight at 4°C. The membrane  
339 was incubated with either polyclonal rabbit anti-GFP antibody (A11122, Life Technologies) for  
340 the protease assay, or mouse anti-flag (F3165, Sigma) for the DUB assay. The membrane was then  
341 washed three times for 15 minutes in TBST buffer followed by incubation with either secondary  
342 donkey anti-rabbit-HRP antibody (711-035-152, Jackson ImmunoResearch) or goat anti-mouse-  
343 HRP antibody (1010-05, SouthernBiotech). Then the membrane was washed three more times for  
344 15 minutes in TBST buffer. Detection was performed using Western Lighting Chemiluminescence  
345 Reagent Plus (PerkinElmer) and visualized using a FluoroChemE Imager (Protein Simple). The  
346 expression of PLP2,  $\beta$ -actin, and calnexin were probed with mouse anti-V5 antibody (R960,  
347 ThermoFisher), mouse anti- $\beta$ -actin (A00702, Genscript), or mouse anti-calnexin antibody (2433S,  
348 Cell Signaling), respectively.

#### 349 **Biosensor live cell assay**

350 The protease activity of PLP2 was also assessed using a biosensor live cell assay as  
351 described previously (14). Briefly, HEK293T cells in a 96 black-wall plate were transfected with  
352 37.5 ng pGlo-RLKGG construct and 50 ng PLP2 expression plasmids. GloSensor (E1290,  
353 Promega) reagent diluted in DMEM+10% FCS was added at 18 hpi. Plates were read using a  
354 luminometer (Veritas) every hour over a course of 5 hours.



### 355 **Generating DUB-mutant MHV**

356 We used a previously described reverse genetics system of MHV-A59 (32) to generate the  
357 DUB-mutant virus. Briefly, the nucleotides coding for the Asp-1772 of the PLP2 domain were  
358 mutated *via* site-directed mutagenesis. Viral genomic RNA from *in vitro* transcription of ligated  
359 cDNA fragments using a mMMESSAGE mMACHINE T7 Transcription Kit (AM1344, Thermal  
360 Fisher) was electroporated into BHK-R cells. Cell supernatants were collected as viral stock  
361 following observation of cytopathic effects. Rescued virus was plaque-purified, propagated on  
362 BHK-R cells, and titrated on 17Cl-1 cells. The stock virus was subjected to full-genome  
363 sequencing and the sequences were aligned to the parental strain, with the intended engineered  
364 mutation detected and no additional mutations detected (Kansas State University Diagnostic  
365 Laboratory).

### 366 **Growth kinetics**

367 DBT cells or BMDMs were infected with wild-type icMHV-A59 or DUB-mutant virus at  
368 a multiplicity of infection (MOI) of 1 in serum-free medium. After a one-hour incubation, the  
369 inoculum was replaced with fresh, complete medium. Cell culture supernatants were collected at  
370 indicated time points and titrated by plaque assay on 17Cl-1 cells. Titers were obtained from three  
371 independent assays for each sample. Graphs of virus kinetics were generated using Prism software  
372 (GraphPad Software).

### 373 **Quantification of IFN $\alpha$ production by RT-qPCR and ELISA**

374 BMDMs in a 12-well plate were mock-infected or infected with MHV at a MOI of 1. At  
375 indicated time points, monolayer cells were collected for RNA extraction and cell culture  
376 supernatants were harvested for ELISA analysis. To determine IFN- $\alpha$ 11,  $\beta$ -actin, or MHV-A59 N  
377 gene mRNA levels, total RNA was extracted from collected cells using a RNeasy Mini Kit (74104,  
378 Qiagen). The first strand cDNA was synthesized from an equal amount of RNA using Rt2 HT First

379 Strand Kit (330401, Qiagen). qPCR was then performed with specific primers for mouse IFN- $\alpha$ 11  
380 (PPM03050B-200, Qiagen), mouse  $\beta$ -actin (PPM02945B-200, Qiagen), or MHV-A59 N gene  
381 using RT2 SYBR Green qPCR Mastermix (330502, Qiagen) in the Bio-Rad CFX96 system. The  
382 thermocycler was set as follows: one step at 95°C (10 min), 40 cycles of 95°C (15 s), 60°C (1 min)  
383 and plate read, one step at 95 °C (10 s), and a melt curve from 65°C to 95°C at increments of  
384 0.5°C/0.05s. Samples were evaluated in triplicate and data are representative of three independent  
385 experiments. The levels of mRNA were reported relative to  $\beta$ -actin mRNA and expressed as  $2^{-\Delta CT}$   
386 [ $\Delta C_T = C_{T(\text{gene of interest})} - C_{T(\beta\text{-actin})}$ ]. The secreted amount of IFN- $\alpha$  in culture supernatants was  
387 assayed using a mouse IFN- $\alpha$  ELISA kit (BMS6027, eBioscience) according to the  
388 manufacturer's instructions.

### 389 **Mouse experiments**

390 Evaluation of MHV pathogenesis in laboratory mouse was previously described (5, 41).  
391 Briefly, for intracranial infections, six-week-old C57BL/6 female mice were inoculated with 600  
392 pfu of virus in 20  $\mu$ L PBS. Infected mice were monitored for body weight daily and euthanized  
393 when weight loss surpassed 25%. Statistical analyses of survival rate were performed using the  
394 log-rank test. For intraperitoneal infection, six- or four week-old mice were injected with  $6 \times 10^3$  or  
395  $6 \times 10^4$  pfu of virus in 100  $\mu$ L PBS. Organs were collected at indicated time points and evaluated  
396 for viral burden. Liver pathology was evaluated using H&E staining by the Tissue Processing Core  
397 Facility at Loyola University Chicago.

### 398 **Acknowledgments**

399 This work was supported by the National Institutes of Health (NIH) grant R01 AI085089  
400 (to SCB and ADM). MH and RCM were supported by NIH T32 Training Grant for Experimental  
401 Immunology (#AI007508) and RCM was supported by the Arthur J. Schmitt Dissertation

402 Fellowship in Leadership and Service (Arthur J. Schmitt Foundation). MEC was supported by an  
403 NIH/NIGMS T32 Training Grant for Structural Biology and Biophysics (#GM132024).  
404 Crystallization and DNA sequencing were partially supported by the Purdue Center for Cancer  
405 Research Macromolecular Crystallography and DNA Sequencing Shared Resources, which are  
406 supported by NIH grant P30 CA023168.

## 407 **Author Contributions**

408           Conceptualization: XD, ADM and SCB. Investigation: XD, YC, AMM, MH, KRK, RCM,  
409 MH, AO, MEC. Formal Analysis: XD, YC, AMM, MH, KRK, RCM, AO, ADM and SCB. Writing  
410 – Original Draft Preparation: XD, YC, AMM, ADM and SCB. Writing – Review & Editing: with  
411 comments from XD, YC, AMM, MH, KRK, RCM, MH, AO, ADM and SCB. Visualization: XD,  
412 YC, KRK, AO, MEC, ADM and SCB. Funding Acquisition and Supervision: ADM and SCB.

## 413 **References**

- 414 1. Perlman S, Netland J. 2009. Coronaviruses post-SARS: update on replication and  
415 pathogenesis. *Nat Rev Microbiol* 7(6):439–50.
- 416 2. Enjuanes L, Almazán F, Sola I, Zuñiga S. 2006. Biochemical aspects of coronavirus  
417 replication and virus-host interaction. *Annu Rev Microbiol* 60:211–230.
- 418 3. Totura AL, Baric RS. 2012. SARS coronavirus pathogenesis: host innate immune  
419 responses and viral antagonism of interferon. *Curr Opin Virol* 2:264–75.
- 420 4. Niemeyer D, Mösbauer K, Klein EM, Sieberg A, Mettelman RC, Mielech AM, Dijkman  
421 R, Baker SC, Drosten C, Müller MA. 2018. The papain-like protease determines a  
422 virulence trait that varies among members of the SARS-coronavirus species. *PLOS Pathog*  
423 14:e1007296.

- 424 5. Deng X, Hackbart M, Mettelman RC, O'Brien A, Mielech AM, Yi G, Kao CC, Baker SC.  
425 2017. Coronavirus nonstructural protein 15 mediates evasion of dsRNA sensors and limits  
426 apoptosis in macrophages. *Proc Natl Acad Sci U S A* 114:E4251–E4260.
- 427 6. Kindler E, Gil-Cruz C, Spanier J, Li Y, Wilhelm J, Rabouw HH, Züst R, Hwang M,  
428 V'kovski P, Stalder H, Marti S, Habjan M, Cervantes-Barragan L, Elliot R, Karl N,  
429 Gaughan C, van Kuppeveld FJM, Silverman RH, Keller M, Ludewig B, Bergmann CC,  
430 Ziebuhr J, Weiss SR, Kalinke U, Thiel V. 2017. Early endonuclease-mediated evasion of  
431 RNA sensing ensures efficient coronavirus replication. *PLOS Pathog* 13:e1006195.
- 432 7. Menachery VD, Gralinski LE, Mitchell HD, Dinnon KH, Leist SR, Yount BL,  
433 McAnarney ET, Graham RL, Waters KM, Baric RS. 2018. Combination attenuation offers  
434 strategy for live-attenuated coronavirus vaccines. *J Virol* 92:e00710-18.
- 435 8. Kindler E, Thiel V, Weber F. 2016. Interaction of SARS and MERS Coronaviruses with  
436 the Antiviral Interferon Response, p. 219–243. *In* *Advances in virus research*.
- 437 9. Mielech AM, Chen Y, Mesecar AD, Baker SC. 2014. Nidovirus papain-like proteases:  
438 Multifunctional enzymes with protease, deubiquitinating and deISGylating activities.  
439 *Virus Res* 194:184–190.
- 440 10. Kanjanahaluethai A, Baker SC. 2000. Identification of mouse hepatitis virus papain-like  
441 proteinase 2 activity. *J Virol* 74:7911–21.
- 442 11. Baker SC, Shieh CK, Soe LH, Chang MF, Vannier DM, Lai MM. 1989. Identification of a  
443 domain required for autoproteolytic cleavage of murine coronavirus gene A polyprotein. *J*  
444 *Virol* 63:3693–9.
- 445 12. Barretto N, Jukneliene D, Ratia K, Chen Z, Mesecar AD, Baker SC. 2005. The papain-like  
446 protease of severe acute respiratory syndrome coronavirus has deubiquitinating activity. *J*

- 447 Virol 79(24):15189–15198.
- 448 13. Mielech AM, Kilianski A, Baez-Santos YM, Mesecar AD, Baker SC. 2014. MERS-CoV  
449 papain-like protease has deISGylating and deubiquitinating activities. *Virology* 450–  
450 451:64–70.
- 451 14. Kilianski A, Mielech A, Deng X, Baker SC. 2013. Assessing Activity and Inhibition of  
452 MERS-CoV Papain-like and 3C-like Proteases Using Luciferase-based Biosensors. *J Virol*  
453 87(21):11955–11962.
- 454 15. Zheng D, Chen G, Guo B, Cheng G, Tang H. 2008. PLP2, a potent deubiquitinase from  
455 murine hepatitis virus, strongly inhibits cellular type I interferon production. *Cell Res*  
456 18:1105–1113.
- 457 16. Chen Y, Savinov SN, Mielech AM, Cao T, Baker SC, Mesecar AD. 2015. X-ray structural  
458 and functional studies of the three tandemly linked domains of non-structural protein 3  
459 (nsp3) from murine hepatitis virus reveal conserved functions. *J Biol Chem* 290:25293–  
460 306.
- 461 17. Ratia K, Kilianski A, Baez-Santos YM, Baker SC, Mesecar A. 2014. Structural basis for  
462 the ubiquitin-linkage specificity and deISGylating activity of SARS-CoV papain-like  
463 protease. *PLoS Pathog* 10:e1004113.
- 464 18. Bailey-Elkin BA, Knaap RCM, Johnson GG, Dalebout TJ, Ninaber DK, van Kasteren PB,  
465 Bredenbeek PJ, Snijder EJ, Kikkert M, Mark BL. 2014. Crystal structure of the MERS  
466 coronavirus papain-like protease bound to ubiquitin facilitates targeted disruption of  
467 deubiquitinating activity to demonstrate its role in innate immune suppression. *J Biol*  
468 *Chem* 289:34667–82.
- 469 19. Mielech AM, Deng X, Chen Y, Kindler E, Wheeler DL, Mesecar AD, Thiel V, Perlman S,

- 470 Baker SC. 2015. Murine coronavirus ubiquitin-like domain is important for papain-like  
471 protease stability and viral pathogenesis. *J Virol* 89:4907–4917.
- 472 20. Békés M, van der Heden van Noort GJ, Ekkebus R, Ovaa H, Huang TT, Lima CD. 2016.  
473 Recognition of Lys48-Linked Di-ubiquitin and Deubiquitinating Activities of the SARS  
474 Coronavirus Papain-like Protease. *Mol Cell* 62:572–585.
- 475 21. Bailey-Elkin BA, Knaap RCM, Kikkert M, Mark BL. 2017. Structure and Function of  
476 Viral Deubiquitinating Enzymes. *J Mol Biol* 429:3441–3470.
- 477 22. Clasman JR, Báez-Santos YM, Mettelman RC, O’Brien A, Baker SC, Mesecar AD. 2017.  
478 X-ray Structure and Enzymatic Activity Profile of a Core Papain-like Protease of MERS  
479 Coronavirus with utility for structure-based drug design. *Sci Rep* 7:40292.
- 480 23. Lindner HA, Fotouhi-Ardakani N, Lytvyn V, Lachance P, Sulea T, Ménard R. 2005. The  
481 papain-like protease from the severe acute respiratory syndrome coronavirus is a  
482 deubiquitinating enzyme. *J Virol* 79(24):15199–208.
- 483 24. Chen Z, Wang Y, Ratia K, Mesecar AD, Wilkinson KD, Baker SC. 2007. Proteolytic  
484 processing and deubiquitinating activity of papain-like proteases of human coronavirus  
485 NL63. *J Virol* 81(11):6007–18.
- 486 25. Clementz M, Chen Z, Banach BS, Wang Y, Sun L, Ratia K, Baez-Santos YM, Wang J,  
487 Takayama J, Ghosh AK, Li K, Mesecar AD, Baker SC. 2010. Deubiquitinating and  
488 interferon antagonism activities of coronavirus papain-like proteases. *J Virol* 84(9):4619–  
489 29.
- 490 26. Xing Y, Chen J, Tu J, Zhang B, Chen X, Shi H, Baker SC, Feng L, Chen Z. 2013. The  
491 papain-like protease of porcine epidemic diarrhea virus negatively regulates type I  
492 interferon pathway by acting as a viral deubiquitinase. *J Gen Virol* 94:1554–67.

- 493 27. Deng X, Agnihothram S, Mielech AM, Nichols DB, Wilson MW, StJohn SE, Larsen SD,  
494 Mesecar AD, Lenschow DJ, Baric RS, Baker SC. 2014. A chimeric virus-mouse model  
495 system for evaluating the function and inhibition of papain-like proteases of emerging  
496 coronaviruses. *J Virol* 88:11825–33.
- 497 28. Frias-Staheli N, Giannakopoulos N V, Kikkert M, Taylor SL, Bridgen A, Paragas J, Richt  
498 J a, Rowland RR, Schmaljohn CS, Lenschow DJ, Snijder EJ, García-Sastre A, Virgin HW.  
499 2007. Ovarian tumor domain-containing viral proteases evade ubiquitin- and ISG15-  
500 dependent innate immune responses. *Cell Host Microbe* 2(6):404–16.
- 501 29. Lenschow DJ, Lai C, Frias-staheli N, Giannakopoulos N V, Lutz A, Wolff T, Osiak A,  
502 Levine B, Schmidt RE, Garcı A, Leib DA, Pekosz A, Knobeloch K, Horak I, Whiting H,  
503 Iv V. 2007. IFN-stimulated gene 15 functions as a critical antiviral molecule against  
504 influenza, herpes, and Sindbis viruses. *Proc Natl Acad Sci USA* 104(4):1371–1376.
- 505 30. Skaug B, Chen ZJ. 2010. Emerging role of ISG15 in antiviral immunity. *Cell* 143(2):187–  
506 190.
- 507 31. Devaraj SG, Wang N, Chen Z, Chen Z, Tseng M, Barretto N, Lin R, Peters CJ, Tseng C-  
508 TK, Baker SC, Li K. 2007. Regulation of IRF-3-dependent innate immunity by the  
509 papain-like protease domain of the severe acute respiratory syndrome coronavirus. *J Biol*  
510 *Chem* 282(44):32208–21.
- 511 32. Yount B, Denison MR, Weiss SR, Ralph S, Baric RS. 2002. Systematic assembly of a  
512 full-length infectious cDNA of mouse hepatitis virus strain A59. *J Virol* 76:11065–11078.
- 513 33. Roth-Cross JK, Bender SJ, Weiss SR. 2008. Murine coronavirus mouse hepatitis virus is  
514 recognized by MDA5 and induces type I interferon in brain macrophages/microglia. *J*  
515 *Virol* 82:9829–38.

- 516 34. Báez-Santos YM, Mielech AM, Deng X, Baker S, Mesecar AD. 2014. Catalytic function  
517 and substrate specificity of the papain-like protease domain of nsp3 from the Middle East  
518 respiratory syndrome coronavirus. *J Virol* 88:12511–27.
- 519 35. Zhu N, Zhang D, Wang W, Li X, Yang B, Song J, Zhao X, Huang B, Shi W, Lu R, Niu P,  
520 Zhan F, Ma X, Wang D, Xu W, Wu G, Gao GF, Tan W. 2020. A Novel Coronavirus from  
521 Patients with Pneumonia in China, 2019. *N Engl J Med* NEJMoa2001017.
- 522 36. Huang C, Wang Y, Li X, Ren L, Zhao J, Hu Y, Zhang L, Fan G, Xu J, Gu X, Cheng Z, Yu  
523 T, Xia J, Wei Y, Wu W, Xie X, Yin W, Li H, Liu M, Xiao Y, Gao H, Guo L, Xie J, Wang  
524 G, Jiang R, Gao Z, Jin Q, Wang J, Cao B. 2020. Clinical features of patients infected with  
525 2019 novel coronavirus in Wuhan, China. *Lancet* 0.
- 526 37. Zhou P, Yang X-L, Wang X-G, Hu B, Zhang L, Zhang W, Si H-R, Zhu Y, Li B, Huang C-  
527 L, Chen H-D, Chen J, Luo Y, Guo H, Jiang R-D, Liu M-Q, Chen Y, Shen X-R, Wang X,  
528 Zheng X-S, Zhao K, Chen Q-J, Deng F, Liu L-L, Yan B, Zhan F-X, Wang Y-Y, Xiao G-  
529 F, Shi Z-L. 2020. A pneumonia outbreak associated with a new coronavirus of probable  
530 bat origin. *Nature* 1–4.
- 531 38. Wu F, Zhao S, Yu B, Chen Y-M, Wang W, Song Z-G, Hu Y, Tao Z-W, Tian J-H, Pei Y-  
532 Y, Yuan M-L, Zhang Y-L, Dai F-H, Liu Y, Wang Q-M, Zheng J-J, Xu L, Holmes EC,  
533 Zhang Y-Z. 2020. A new coronavirus associated with human respiratory disease in China.  
534 *Nature* 1–8.
- 535 39. Heaton SM, Borg NA, Dixit VM. 2016. Ubiquitin in the activation and attenuation of  
536 innate antiviral immunity. *J Exp Med* 213:1–13.
- 537 40. Pettersen EF, Goddard TD, Huang CC, Couch GS, Greenblatt DM, Meng EC, Ferrin TE.  
538 2004. UCSF Chimera?A visualization system for exploratory research and analysis. *J*



539 Comput Chem 25:1605–1612.

540 41. Deng X, StJohn SE, Osswald HL, O'Brien A, Banach BS, Sleeman K, Ghosh AK,  
541 Mesecar AD, Baker SC. 2014. Coronaviruses resistant to a 3C-like protease inhibitor are  
542 attenuated for replication and pathogenesis, revealing a low genetic barrier but high fitness  
543 cost of resistance. *J Virol* 88:11886–11898.

## 544 **Figure Legends**

545 **Figure 1. X-ray structure of the MHV PLP2-Ubiquitin complex and residues involved in**  
546 **ubiquitin-binding.** (A) Overall structure of MHV PLP2-C1716S-Ub complex. Domains are color  
547 coded: Ub in yellow, Ubl2 domain of PLP2 in purple, thumb domain in orange, palm domain in  
548 cyan, and fingers domain in green. Residue D1772 of PLP2 is located outside of the active site  
549 which is circled in black. (B) Hydrogen bond interactions between MHV PLP2 R1803 and the  
550 backbone of A46 of ubiquitin. (C) Binding interactions between MHV PLP2 D1772 and two  
551 arginine residues (R42 and R72) of ubiquitin. (D) Hydrophobic interactions between F1812 of  
552 MHV PLP2 and ubiquitin residues I44 and V70. The 2Fo-Fc maps (blue) surrounding the residues  
553 are contoured at  $1\sigma$  in each panel. The PDB coordinates for the MHV PLP2-C1716S-Ub complex  
554 have been deposited under PDB Code 5WFI. (E) Sequence alignment (MultAlign) of coronavirus  
555 papain-like protease/deubiquitinating domains from MHV (1606-1911 aa, accession  
556 #AAX23975), SARS (1541-1854 aa, accession #ACZ72209), 2019-nCoV (1564-1878, accession  
557 #QHO60603) and MERS (1480-1803 aa, accession # AHY21467). Amino acids are colored by  
558 similarity using the RISER coloring scheme. Numbering shown is based on MHV sequence.  
559 Amino acids mutated in this study are indicated with a black asterisk, the catalytic cysteine is  
560 indicated by a blue asterisk, and those amino acids that bind ubiquitin and were mutated in this

561 study are boxed in green. The active site substrate binding loop also involved in binding inhibitors  
562 of SARS is shown highlighted in yellow. The sequence alignment was created using ESPript3.

563 **Figure 2. Structure-guided mutagenesis of MHV PLP2 reveals that D1772A disrupts**  
564 **ubiquitin binding and reduces DUB activity.** (A) Relative kinetic activities of three mutant  
565 MHV PLP2 enzymes toward three substrates: z-RLRGG-AMC (green), Ub-AMC (blue), and  
566 ISG15-AMC (yellow) compared to the wild-type enzyme. (B) Steady-state kinetic parameters for  
567 wild type and D1772A mutant enzymes. (C) Sequence alignment of Ub and ISG15 from human  
568 and mouse generated by Clustal Omega. The two arginine residues of Ub (R42 and R72) that  
569 interact with D1772 are indicated by arrows. R72 is conserved between Ub and ISG15, whereas  
570 R42 (shaded in yellow) is only present in Ub. Accession numbers: Human\_Ub, 1ubq; Mouse\_Ub,  
571 P62991; Human\_ISG15, AAH09507; Mouse\_ISG15, AAI09347. The sequence alignment was  
572 created using ESPript.

573 **Figure 3. D1772A substitution in the coronavirus papain-like protease Ub-binding site**  
574 **reduces DUB activity and interferon antagonism without reducing protease activity.** (A)  
575 Western blot assessing the DUB activity of PLP2. (B) IFN antagonism of PLP2 was determined  
576 using an IFN-luciferase reporter stimulated by N-RIG-I expression. The reporter activity of vector  
577 control was set to 100% (indicated by a dash line). (C and D) Protease activity was evaluated using  
578 (C) a trans-cleavage assay that detects the cleaved products by western blot and (D) a pGlo  
579 biosensor assay which is activated by PLP2-mediated cleavage of the substrate. Data are  
580 representative of at least two independent experiments. Data in (B) and (D) are presented as means  
581  $\pm$  SD.

582 **Figure 4. Evaluating the replication kinetics of, and level of interferon activation by, WT**  
583 **MHV and DUBmut in cell culture.** (A) Replication kinetics of WT and DUBmut virus in DBT

584 cells. (B) IFN $\alpha$ 11 mRNA levels in WT- and DUBmut-infected BMDMs were assessed at indicated  
585 time points by qRT-PCR. (C) IFN $\alpha$  protein levels in the supernatants of infected BMDMs were  
586 evaluated at the times indicated. (D) Comparison of IFN $\alpha$ 11 levels in B6 versus MDA5 $^{-/-}$  BMDMs  
587 at 12 hours post-infection (HPI). (E) Assessing levels of viral nucleocapsid (N) mRNA by qRT-  
588 PCR. (F) Replication kinetics of WT and DUBmut virus in BMDM cells. Data are representative  
589 of at least two independent experiments and are presented as means  $\pm$  SD. Data in (B) and (C)  
590 were statistically analyzed using unpaired t-tests. \*,  $p < 0.05$ ; \*\*,  $p < 0.01$ .

591 **Figure 5. Evaluating replication and pathogenesis of MHV-DUBmut in mice.** Four- (A) or  
592 six-week-old (B) mice were infected with indicated doses of MHV. Viral titer in livers and spleens  
593 isolated from WT- or DUBmut virus-infected mice was determined by plaque assay. The number  
594 of mice in each group is shown in parentheses. Data were statistically analyzed using unpaired t-  
595 tests and are presented as means  $\pm$  SEM. (C) H&E staining of liver sections from infected mice at  
596 3 and 5 days post-infection (DPI). Representative MHV-associated liver lesions are indicated by  
597 arrows.

598 **Figure 6. Alignment of the nCoV-2019 PLpro domain with the X-ray structure of the closely**  
599 **related SARS-CoV PLpro domain in complex with ubiquitin.** (A) X-ray structure of SARS-  
600 CoV PLpro-ubiquitin-aldehyde complex (blue) (PDB: 4MM3) with each of its domains labeled as  
601 finger, palm, thumb, and Ubl2. Ubiquitin-aldehyde is colored yellow. The nCoV-2019 PLpro  
602 structure (cyan) was modeled by first mutating the residues of SARS PLpro in the X-ray structure  
603 to those of nCoV-2019 PLpro based upon the sequence alignment in Figure 1E. The nCoV-2019  
604 PLpro-Ubiquitin-aldehyde complex was then refined using the structure-factor amplitudes and  
605 initial phases of the SARS PLP-Ubiquitin aldehyde complex (PDB: 4MM3). The residues that are  
606 different between SARS-CoV PLpro and nCoV-2019 PLpro are highlighted as sticks. (B) Potential

607 interactions between L1803 of SARS-CoV PLpro and nCoV-2019 PLpro with residue A46 of  
608 ubiquitin. (C) Predicted interaction between E1772 of SARS-CoV PLpro and nCoV-2019 PLpro  
609 and residues R42 and R72 of ubiquitin. (D) Potential interactions between residues I44, V70, and  
610 R42 of ubiquitin with residues M1812 of SARS-CoV PLpro and nCoV-2019 PLpro.

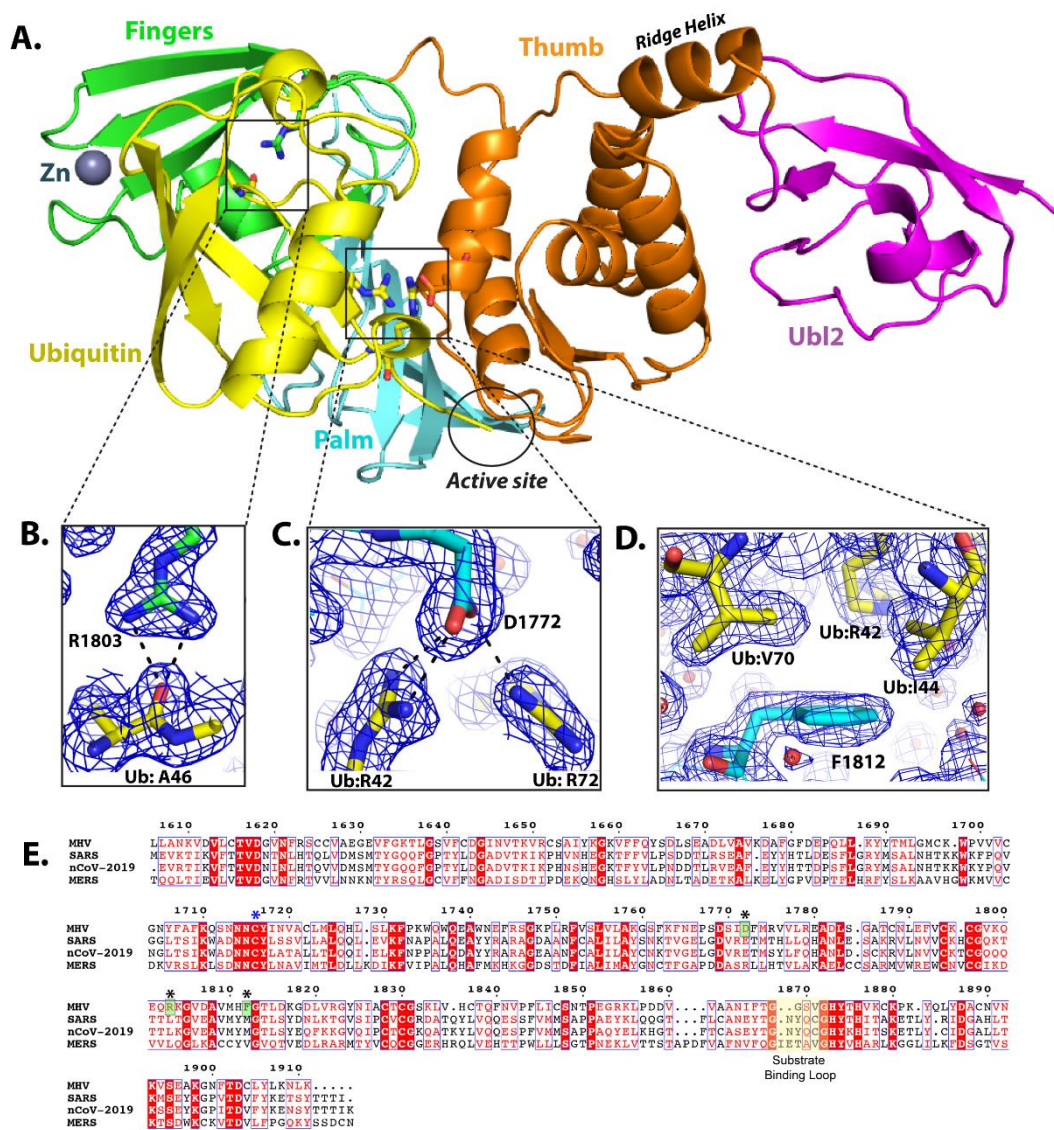

**Figure 1. X-ray structure of the MHV PLP2-Ubiquitin complex and residues involved in ubiquitin-binding.** (A) Overall structure of MHV PLP2-C1716S-Ub complex. Domains are color coded: Ub in yellow, Ubl2 domain of PLP2 in purple, thumb domain in orange, palm domain in cyan, and fingers domain in green. Residue D1772 of PLP2 is located outside of the active site which is circled in black. (B) Hydrogen bond interactions between MHV PLP2 R1803 and the backbone of A46 of ubiquitin. (C) Binding interactions between MHV PLP2 D1772 and two arginine residues (R42 and R72) of ubiquitin. (D) Hydrophobic interactions between F1812 of MHV PLP2 and ubiquitin residues I44 and V70. The 2Fo-Fc maps (blue) surrounding the residues are contoured at  $1\sigma$  in each panel. The PDB coordinates for the MHV PLP2-C1716S-Ub complex have been deposited under PDB Code 5WFI. (E) Sequence alignment (MultAlign) of coronavirus papain-like protease/deubiquitinating domains from MHV (1606-1911 aa, accession #AAX23975), SARS (1541-1854 aa, accession #ACZ72209), 2019-nCoV (1564-1878, accession #QHO60603) and MERS (1480-1803 aa, accession # AHY21467). Amino acids are colored by similarity using the RISER coloring scheme. Numbering shown is based on MHV sequence. Amino acids mutated in this study are indicated with a black asterisk, the catalytic cysteine is indicated by a blue asterisk, and those amino acids that bind ubiquitin and were mutated in this study are boxed in green. The active site substrate binding loop also involved in binding inhibitors of SARS is shown highlighted in yellow. The sequence alignment was created using ESPript3.

**A**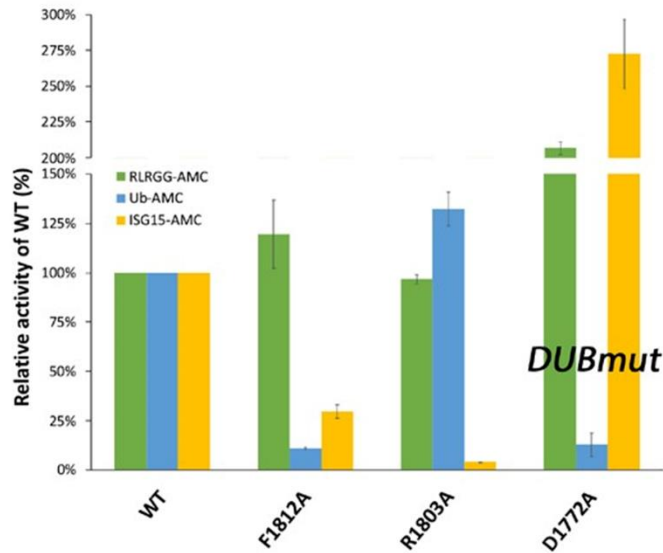**B**

|                                                     | RLRGG-AMC                        | Ub-AMC           | ISG15-AMC         |
|-----------------------------------------------------|----------------------------------|------------------|-------------------|
| <b>Wild type</b>                                    |                                  |                  |                   |
| $k_{cat}$ ( $\text{min}^{-1}$ )                     | -                                | $42.4 \pm 1.2$   | -                 |
| $K_m$ ( $\mu\text{M}$ )                             | -                                | $0.67 \pm 0.06$  | -                 |
| $k_{cat}/K_m$ ( $\text{min}^{-1}\mu\text{M}^{-1}$ ) | $^a 2.4 \pm 0.04 \times 10^{-3}$ | $63 \pm 5.6$     | $^a 2.4 \pm 0.07$ |
| <b>D1772A</b>                                       |                                  |                  |                   |
| $k_{cat}$ ( $\text{min}^{-1}$ )                     | -                                | -                | -                 |
| $K_m$ ( $\mu\text{M}$ )                             | -                                | -                | -                 |
| $k_{cat}/K_m$ ( $\text{min}^{-1}\mu\text{M}^{-1}$ ) | $^a 5.1 \pm 0.07 \times 10^{-3}$ | $^a 7.8 \pm 0.2$ | $^a 7.4 \pm 0.06$ |

<sup>a</sup>Saturation with substrate(s) could not be achieved.

**C**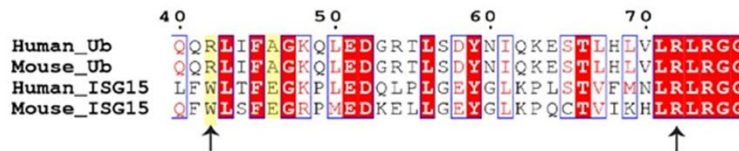

**Figure 2. Structure-guided mutagenesis of MHV PLP2 reveals that D1772A disrupts ubiquitin binding and reduces DUB activity.** (A) Relative kinetic activities of three mutant MHV PLP2 enzymes toward three substrates: z-RLRGG-AMC (green), Ub-AMC (blue), and ISG15-AMC (yellow) compared to the wild-type enzyme. (B) Steady-state kinetic parameters for wild type and D1772A mutant enzymes. (C) Sequence alignment of Ub and ISG15 from human and mouse generated by Clustal Omega. The two arginine residues of Ub (R42 and R72) that interact with D1772 are indicated by arrows. R72 is conserved between Ub and ISG15, whereas R42 (shaded in yellow) is only present in Ub. Accession numbers: Human\_Ub, 1ubq; Mouse\_Ub, P62991; Human\_ISG15, AAH09507; Mouse\_ISG15, AA109347. The sequence alignment was created using ESPript.

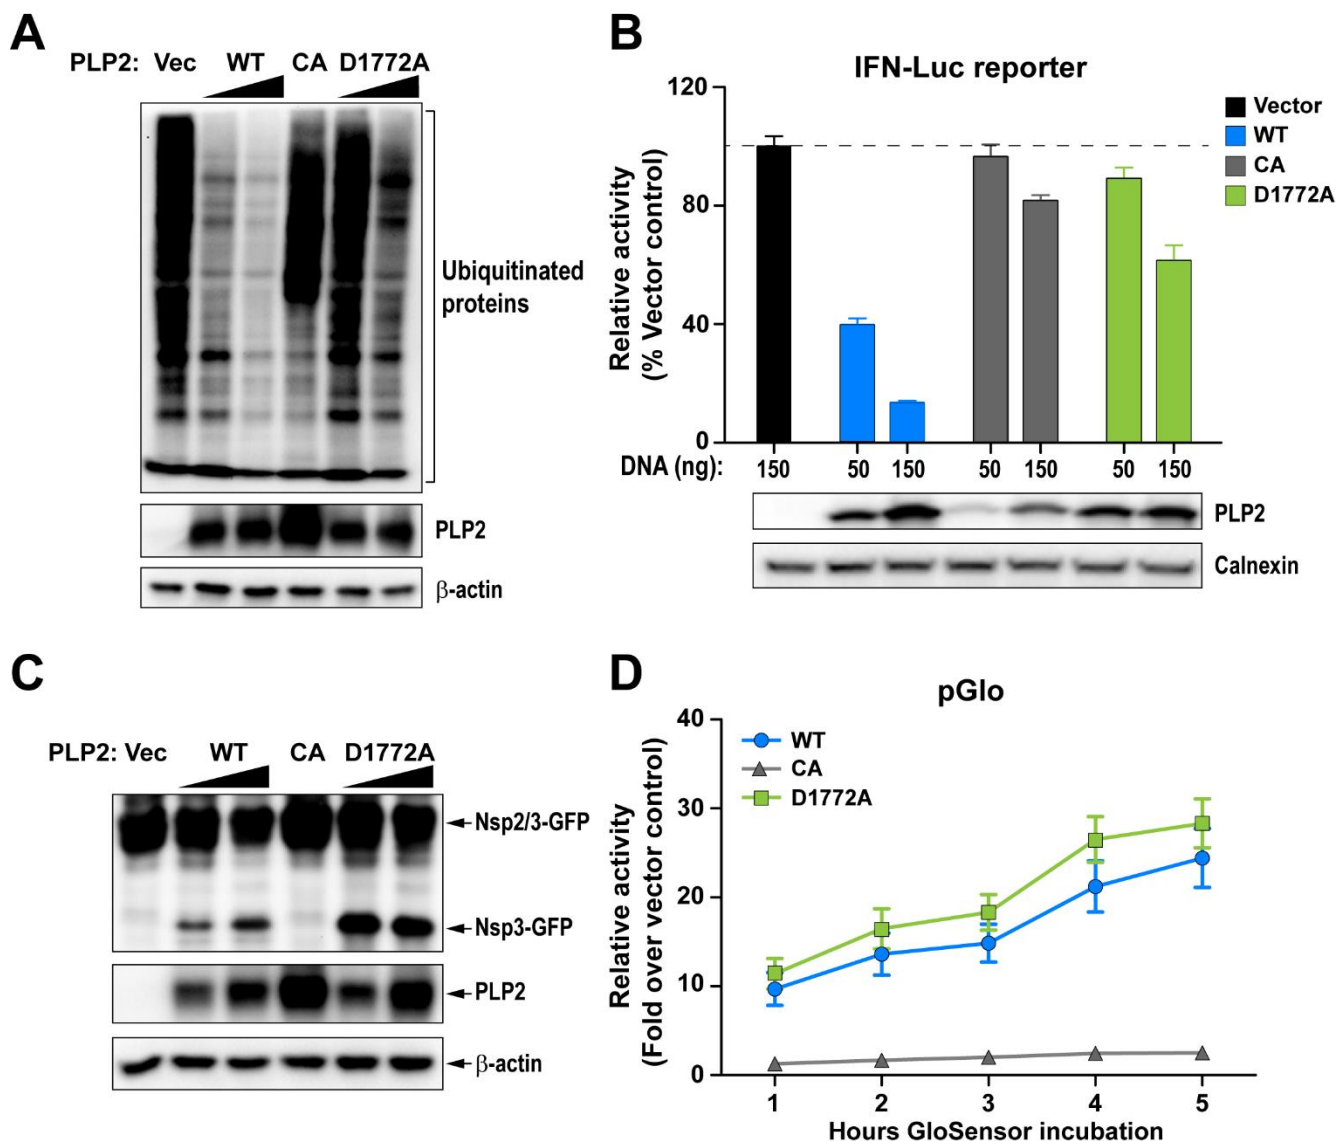

**Figure 3. D1772A substitution in the coronavirus papain-like protease Ub-binding site reduces DUB activity and interferon antagonism without reducing protease activity.** (A) Western blot assessing the DUB activity of PLP2. (B) IFN antagonism of PLP2 was determined using an IFN-luciferase reporter stimulated by N-RIG-I expression. The reporter activity of vector control was set to 100% (indicated by a dash line). (C and D) Protease activity was evaluated using (C) a trans-cleavage assay that detects the cleaved products by western blot and (D) a pGlo biosensor assay which is activated by PLP2-mediated cleavage of the substrate. Data are representative of at least two independent experiments. Data in (B) and (D) are presented as means  $\pm$  SD.

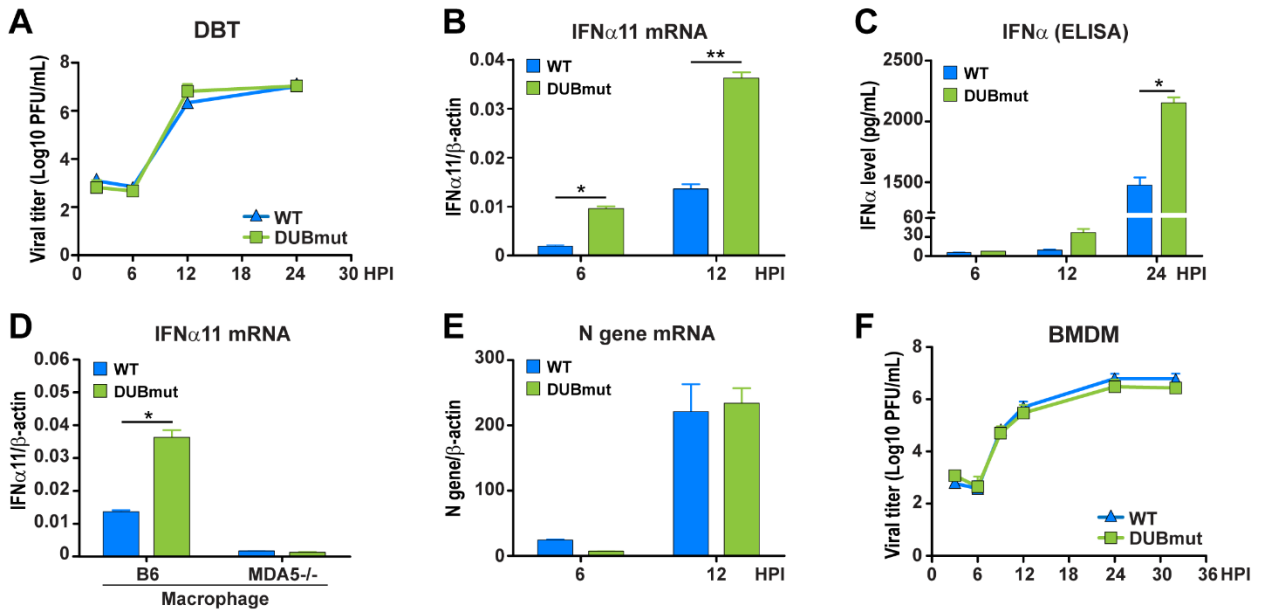

**Figure 4. Evaluating the replication kinetics of, and level of interferon activation by, WT MHV and DUBmut in cell culture.** (A) Replication kinetics of WT and DUBmut virus in DBT cells. (B) IFN $\alpha$ 11 mRNA levels in WT- and DUBmut-infected BMDMs were assessed at indicated time points by qRT-PCR. (C) IFN $\alpha$  protein levels in the supernatants of infected BMDMs were evaluated at the times indicated. (D) Comparison of IFN $\alpha$ 11 levels in B6 versus MDA5<sup>-/-</sup> BMDMs at 12 hours post-infection (HPI). (E) Assessing levels of viral nucleocapsid (N) mRNA by qRT-PCR. (F) Replication kinetics of WT and DUBmut virus in BMDM cells. Data are representative of at least two independent experiments and are presented as means  $\pm$  SD. Data in (B) and (C) were statistically analyzed using unpaired t-tests. \*,  $p < 0.05$ ; \*\*,  $p < 0.01$ .



**A** 4-week-old,  $6 \times 10^3$  pfu per mouse

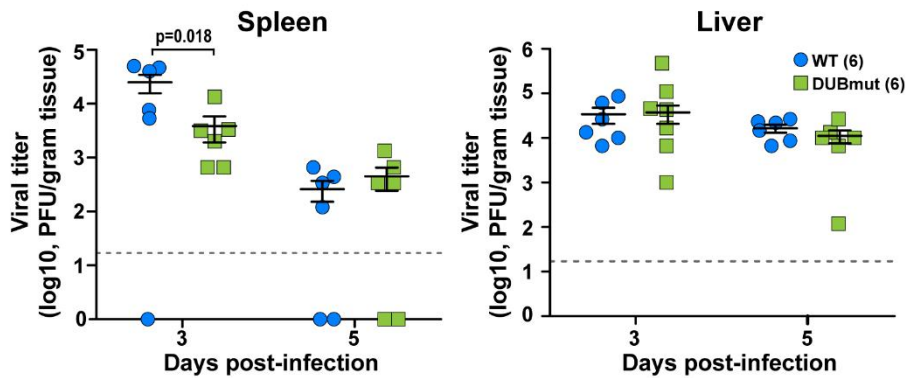

**B** 6-week-old,  $6 \times 10^4$  pfu per mouse

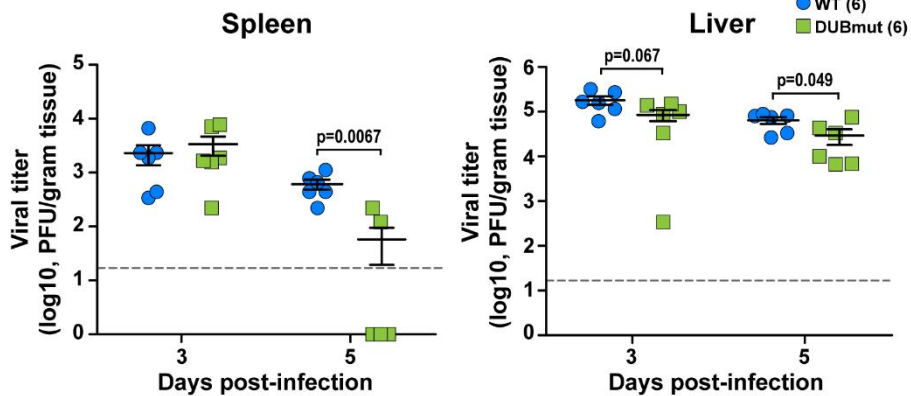

**C** 6-week-old  
 $6 \times 10^4$  pfu per mouse

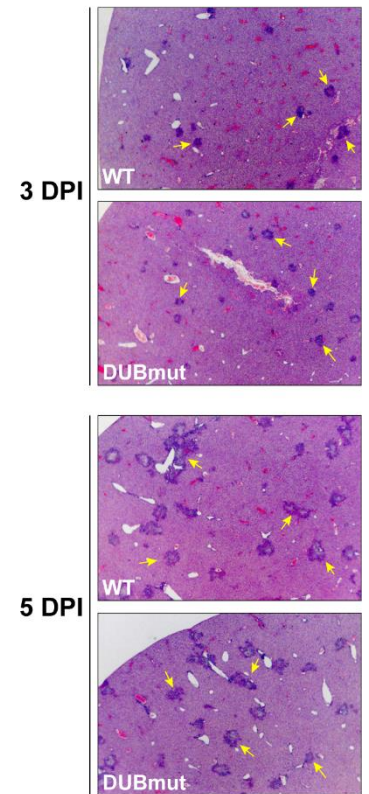

**Figure 5. Evaluating replication and pathogenesis of MHV-DUBmut in mice.** Four- (A) or six-week-old (B) mice were infected with indicated doses of MHV. Viral titer in livers and spleens isolated from WT- or DUBmut virus-infected mice was determined by plaque assay. The number of mice in each group is shown in parentheses. Data were statistically analyzed using unpaired t-tests and are presented as means  $\pm$  SEM. (C) H&E staining of liver sections from infected mice at 3 and 5 days post-infection (DPI). Representative MHV-associated liver lesions are indicated by arrows.

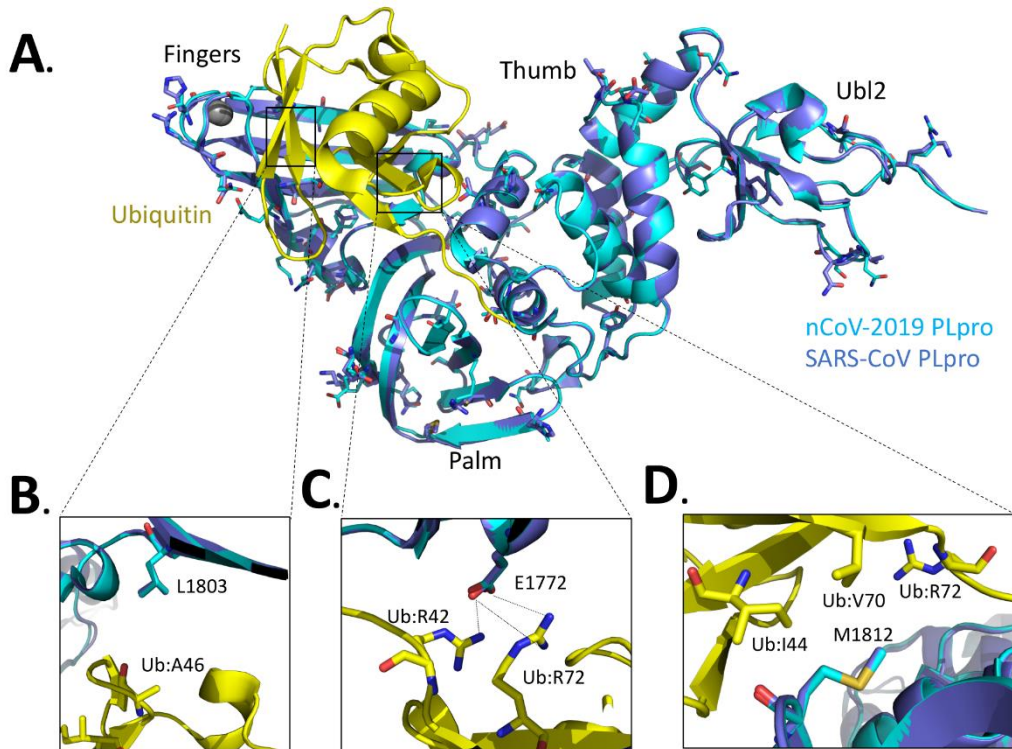

**Figure 6. Alignment of the nCoV-2019 PLpro domain with the X-ray structure of the closely related SARS-CoV PLpro domain in complex with ubiquitin.** (A) X-ray structure of SARS-CoV PLpro-ubiquitin-aldehyde complex (blue) (PDB: 4MM3) with each of its domains labeled as finger, palm, thumb, and Ubl2. Ubiquitin-aldehyde is colored yellow. The nCoV-2019 PLpro structure (cyan) was modeled by first mutating the residues of SARS PLpro in the X-ray structure to those of nCoV-2019 PLpro based upon the sequence alignment in Figure 1E. The nCoV-2019 PLpro-Ubiquitin-aldehyde complex was then refined using the structure-factor amplitudes and initial phases of the SARS PLP-Ubiquitin aldehyde complex (PDB: 4MM3). The residues that are different between SARS-CoV PLpro and nCoV-2019 PLpro are highlighted as sticks. (B) Potential interactions between L1803 of SARS-CoV PLpro and nCoV-2019 PLpro with residue A46 of ubiquitin. (C) Predicted interaction between E1772 of SARS-CoV PLpro and nCoV-2019 PLpro and residues R42 and R72 of ubiquitin. (D) Potential interactions between residues I44, V70, and R42 of ubiquitin with residues M1812 of SARS-CoV PLpro and nCoV-2019 PLpro.
